# Supplementary material for: Volatile and Non-Volatile Characterization of White and Rosé Wines from Different Spanish Protected Designations of Origin
Source: MDPI journal article supplement (doi:10.3390/beverages7030049), 2021-07-06
Supplement: s1 [file s1]

## Supplementary Information

**Table S1.** Concentration of individual low molecular weight phenolic compounds (mg/L) identified and quantified in the white wines.

|                             | PROTECTED DESIGNATION OF ORIGIN |                |                |                |                | GRAPE VARIETY |                 |                |
|-----------------------------|---------------------------------|----------------|----------------|----------------|----------------|---------------|-----------------|----------------|
|                             | RD                              | BI             | TO             | CI             | RU             | VERDEJO       | SAUVIGNON BLANC | MALVASIA       |
| <b>HBA</b>                  |                                 |                |                |                |                |               |                 |                |
| Gallic acid                 | 4.78                            | 4.75           | 8.68           | 6.10           | 5.16           | 7.29 <b>b</b> | 4.50 <b>ab</b>  | 3.70 <b>a</b>  |
| Protocatechuic acid         | 1.46 <b>b</b>                   | 1.05 <b>ab</b> | 1.35 <b>b</b>  | 0.47 <b>a</b>  | 0.83 <b>ab</b> | 0.97          | 0.71            | 0.87           |
| Vanillic acid               | 0.68 <b>b</b>                   | 0.08 <b>a</b>  | 0.56 <b>b</b>  | 0.03 <b>a</b>  | 0.65 <b>b</b>  | 0.56          | 0.40            | 0.61           |
| Syringic acid               | 0.91 <b>a</b>                   | 0.63 <b>a</b>  | 1.37 <b>a</b>  | 1.18 <b>a</b>  | 2.59 <b>b</b>  | 2.47          | 1.64            | 0.58           |
| Ellagic acid                | 0.13 <b>ab</b>                  | n.d. <b>a</b>  | 0.12 <b>ab</b> | 0.10 <b>ab</b> | 0.21 <b>b</b>  | 0.24          | 0.05            | 0.00           |
| Ethyl gallate               | 0.76                            | 0.91           | 2.58           | 1.68           | 0.96           | 1.98          | 0.56            | 0.76           |
| <b>HCA</b>                  |                                 |                |                |                |                |               |                 |                |
| Caffeic acid                | 1.45 <b>a</b>                   | 1.65 <b>a</b>  | 1.80 <b>a</b>  | 2.04 <b>ab</b> | 3.36 <b>b</b>  | 3.10 <b>b</b> | 2.70 <b>ab</b>  | 0.88 <b>a</b>  |
| <i>Trans</i> -coumaric acid | 1.18 <b>ab</b>                  | 1.18 <b>ab</b> | 0.78 <b>a</b>  | 0.76 <b>a</b>  | 1.52 <b>b</b>  | 1.17 <b>b</b> | 1.63 <b>c</b>   | 0.48 <b>a</b>  |
| <b>HCATE</b>                |                                 |                |                |                |                |               |                 |                |
| <i>Trans</i> -caftaric acid | 13.42 <b>b</b>                  | 8.12 <b>ab</b> | 7.27 <b>a</b>  | 5.62 <b>a</b>  | 7.85 <b>a</b>  | 6.43          | 8.65            | 9.62           |
| <i>Cis</i> -coutaric acid   | 2.08 <b>b</b>                   | 1.11 <b>a</b>  | 1.35 <b>ab</b> | 0.71 <b>a</b>  | 1.77 <b>b</b>  | 1.01 <b>a</b> | 2.53 <b>c</b>   | 1.92 <b>b</b>  |
| <i>Trans</i> coutaric acid  | 5.01 <b>b</b>                   | 1.80 <b>a</b>  | 1.56 <b>a</b>  | 0.67 <b>a</b>  | 1.18 <b>a</b>  | 0.76 <b>a</b> | 1.66 <b>b</b>   | 2.60 <b>c</b>  |
| <i>Trans</i> fertaric acid  | 1.54 <b>ab</b>                  | 1.08 <b>a</b>  | 1.85 <b>bc</b> | 1.84 <b>bc</b> | 2.19 <b>c</b>  | 2.35 <b>b</b> | 1.57 <b>a</b>   | 1.39 <b>a</b>  |
| <b>FLAVANOLS</b>            |                                 |                |                |                |                |               |                 |                |
| Catechin                    | 1.47 <b>a</b>                   | 3.48 <b>bc</b> | 5.19 <b>d</b>  | 2.88 <b>ab</b> | 4.35 <b>cd</b> | 4.45          | 3.88            | 4.54           |
| Epicatechin                 | 2.28 <b>b</b>                   | 0.69 <b>a</b>  | 0.92 <b>ab</b> | 0.73 <b>a</b>  | 0.93 <b>ab</b> | 0.91          | 1.12            | 0.29           |
| <b>FLAVONOLS</b>            |                                 |                |                |                |                |               |                 |                |
| Quercetin                   | 0.07 <b>ab</b>                  | 0.01 <b>a</b>  | 0.14 <b>ab</b> | 0.18 <b>b</b>  | 0.04 <b>a</b>  | 0.10          | 0.02            | 0.15           |
| Quercetin derivatives       | 0.77 <b>ab</b>                  | 0.07 <b>a</b>  | 0.39 <b>ab</b> | 0.30 <b>ab</b> | 0.82 <b>b</b>  | 0.68          | 0.47            | 0.66           |
| <b>PHENOLIC ALCOHOLS</b>    |                                 |                |                |                |                |               |                 |                |
| Tyrosol                     | 15.2                            | 12.3           | 11.8           | 12.4           | 11.2           | 12.2          | 8.82            | 143.0          |
| Tryptophol                  | 3.76 <b>b</b>                   | 1.42 <b>a</b>  | 1.38 <b>a</b>  | 1.91 <b>a</b>  | 1.18 <b>a</b>  | 1.63 <b>b</b> | 0.61 <b>a</b>   | 1.48 <b>ab</b> |

Values with different letter in the same row indicate statistically significant differences ( $p < 0.05$ ), and values without letter indicate no statistically significant differences.

n.d. Not detected

**Table S2.** Concentration of individual volatile compounds ( $\mu\text{g/L}$ ) identified and quantified in the white wines.

|                        | PROTECTED DESIGNATION OF ORIGIN |          |         |          |          | GRAPE VARIETY |                |           |
|------------------------|---------------------------------|----------|---------|----------|----------|---------------|----------------|-----------|
|                        | RD                              | BI       | TO      | CI       | RU       | VERDEJO       | SAUVIGNONBLANC | MALVASIA  |
| HIGHER ALCOHOLS        |                                 |          |         |          |          |               |                |           |
| 1-propanol             |                                 |          | 32049   | 29807    |          |               |                |           |
|                        | 20343 a                         | 21556 a  | ab      | ab       | 37426 b  | 37921         | 32093          | 23053     |
| Isobutanol             | 25468                           | 23267    | 32340   | 25467    |          |               |                |           |
|                        | ab                              | ab       | b       | ab       | 16239 a  | 19895 a       | 16254 a        | 45250 b   |
| 1-butanol              | 178 a                           | 711 abc  | 536 ab  | 883 bc   | 929 c    | 845           | 883            | 558       |
| 2-methyl-1-butanol     | 24938                           |          | 28846   |          |          |               |                |           |
|                        | ab                              | 27389 b  | b       | 28293 b  | 22088 a  | 24368 a       | 21084 a        | 35748 b   |
| 3-methyl-1-butanol     | 153598                          | 156644   | 174393  | 149647   |          |               |                |           |
|                        | ab                              | ab       | b       | ab       | 140460 a | 145928 a      | 144190 a       | 190755 b  |
| 2-phenylethanol        | 19025                           | 17591    | 18053   |          |          |               |                |           |
|                        | ab                              | ab       | ab      | 20571 b  | 14866 a  | 17753 a       | 13575 a        | 16900 ab  |
| ETHYL ESTERS           |                                 |          |         |          |          |               |                |           |
| Ethyl butyrate         | 421 ab                          | 330 a    | 353 a   | 329 a    | 455 b    | 416           | 406            | 373       |
| Ethyl isovalerate      | 47.0 c                          | 35.1 c   | 13.4 a  | 38.4 c   | 24.8 b   | 26.5 b        | 25.5 b         | 8.2 a     |
| Ethyl-2-methylbutyrate | 25.5 b                          | 20.7 b   | 7.4 a   | 21.9 b   | 11.2 a   | 13.4 b        | 12.3 ab        | 3.5 a     |
| Ethyl hexanoate        | 644                             | 745      | 631     | 694      | 811      | 736           | 809            | 667       |
|                        |                                 |          | 1375    |          |          |               |                |           |
| Ethyl octanoate        | 813 ab                          | 807 a    | ab      | 2440 b   | 1245 ab  | 1507          | 1304           | 1690      |
| Ethyl decanoate        | 211 ab                          | 192 a    | 534 bc  | 646 c    | 494 bc   | 523           | 478            | 684       |
| ALCOHOL ACETATES       |                                 |          |         |          |          |               |                |           |
| Propyl acetate         | 14.0 a                          | 18.3 a   | 49.9 b  | 15.5 a   | 56.4 b   | 44.7          | 52.6           | 56.4      |
| Isobutyl acetate       | 22.3 a                          | 24.0 a   | 75.4 c  | 30.4 a   | 55.8 b   | 47.6 a        | 64.7 b         | 89.3 c    |
| Isoamyl acetate        | 751 a                           | 904 a    | 3191 b  | 872 a    | 3722 b   | 2691.4 a      | 4194.8 b       | 3113.5 ab |
| Hexyl acetate          | 17.7 a                          | 62.1 ab  | 123.6 b | 35.2 a   | 187.0 c  | 109.1 a       | 242.8 b        | 139.2 a   |
| β-phenethyl acetate    | 121ab                           | 117 a    | 233 c   | 82 a     | 212 bc   | 164.8 a       | 215.3 a        | 326.7 b   |
| ALCOHOLS C6            |                                 |          |         |          |          |               |                |           |
| 1-hexanol              | 542 a                           | 1161 b   | 1128 b  | 1309 b   | 1423 b   | 1154 a        | 1860 b         | 1156 a    |
| Trans-3-hexenol        | 51.3 a                          | 91.0 a   | 99.7 a  | 112.8 a  | 187.0 b  | 134 a         | 237 b          | 71 a      |
| Cis-3-hexenol          | 67.4 a                          | 132.6 ab | 117.1 a | 169.9 ab | 186.91 b | 136 a         | 256 b          | 142 a     |
| TERPENES               |                                 |          |         |          |          |               |                |           |
| Linalool               | 123.6 c                         | 59.7 b   | 29.0 a  | 34.9 a   | 32.7 a   | 28.9          | 40.2           | 32.3      |
| α-Terpineol            | 19.4 c                          | 12.2 bc  | 8.4 ab  | 2.6 a    | 4.0 a    | 4.15          | 4.89           | 8.90      |
| β-citronellol          | 2.10 a                          | 2.39 a   | 3.99 a  | 9.50 b   | 3.16 a   | 5.09          | 2.84           | 4.17      |
| WHISKEY LACTONES       |                                 |          |         |          |          |               |                |           |
| Trans-whiskey lactone  | 46.7 b                          | 17.9 ab  | 7.2 a   | 27.2 ab  | 13.8 a   | 21.8 b        | 0.84 a         | 2.15 a    |
| Cis-whiskey lactone    | 58.2                            | 28.2     | 10.4    | 29.8     | 18.5     | 28.5          | 0.14           | 0.52      |
| VANILLIC DERIVATIVES   |                                 |          |         |          |          |               |                |           |

|                                  |                |                |                |                |                |                |                |                |
|----------------------------------|----------------|----------------|----------------|----------------|----------------|----------------|----------------|----------------|
| Vanillin                         | 24.7           | 33.3           | 43.5           | 27.2           | 25.5           | 28.9           | 28.5           | 42.0           |
| Methyl vanillate                 | 15.7 <b>bc</b> | 6.6 <b>a</b>   | 10.9 <b>ab</b> | 18.8 <b>c</b>  | 13.4 <b>bc</b> | 14.2           | 13.7           | 10.4           |
| Ethyl vanillate                  | 15.4 <b>b</b>  | 10.5 <b>ab</b> | 10.0 <b>ab</b> | 9.0 <b>ab</b>  | 6.8 <b>a</b>   | 7.8 <b>ab</b>  | 7.1 <b>a</b>   | 11.0 <b>b</b>  |
| Acetovanillone                   | 25.1 <b>a</b>  | 30.0 <b>a</b>  | 68.5 <b>c</b>  | 66.7 <b>bc</b> | 51.6 <b>b</b>  | 61.9 <b>b</b>  | 46.1 <b>a</b>  | 65.3 <b>b</b>  |
| <b>FURANIC DERIVATIVES</b>       |                |                |                |                |                |                |                |                |
| Furfural                         | 168            | 205            | 179            | 253            | 175            | 271 <b>b</b>   | 52.8 <b>a</b>  | 19.2 <b>a</b>  |
| 5-Methylfurfural                 | 15.8           | 25.7           | 39.2           | 26.7           | 21.0           | 40.0 <b>b</b>  | 2.76 <b>a</b>  | 1.85 <b>a</b>  |
| Furfuryl alcohol                 | 892 <b>a</b>   | 883 <b>a</b>   | 1668 <b>b</b>  | 943 <b>a</b>   | 1224 <b>a</b>  | 1291 <b>ab</b> | 1051 <b>a</b>  | 1803 <b>b</b>  |
| <b>POSITIVE VOLATILE PHENOLS</b> |                |                |                |                |                |                |                |                |
| Guaiacol                         | 11.9 <b>b</b>  | 10.9 <b>b</b>  | 6.5 <b>b</b>   | 0.37 <b>a</b>  | 0.27 <b>a</b>  | 1.76 <b>a</b>  | 0.13 <b>a</b>  | 6.28 <b>b</b>  |
| Eugenol                          | 14.2 <b>b</b>  | 6.5 <b>ab</b>  | 3.6 <b>a</b>   | 5.8 <b>ab</b>  | 4.7 <b>a</b>   | 5.91           | 2.74           | 1.33           |
| <i>Trans</i> -isoeugenol         | 9.0 <b>ab</b>  | 8.5 <b>ab</b>  | 16.5 <b>ab</b> | n.d. <b>a</b>  | 22.8 <b>b</b>  | 22.6 <b>b</b>  | 4.5 <b>a</b>   | 17.2 <b>ab</b> |
| Syringol                         | 4.68 <b>ab</b> | 5.03 <b>b</b>  | 2.52 <b>a</b>  | 6.62 <b>bc</b> | 7.72 <b>c</b>  | 7.24 <b>b</b>  | 5.41 <b>ab</b> | 2.35 <b>a</b>  |
| 4-methyl-syringol                | 25.9 <b>c</b>  | 12.8 <b>bc</b> | 14.8 <b>bc</b> | 1.9 <b>ab</b>  | 1.3 <b>a</b>   | 5.82 <b>ab</b> | 0.69 <b>a</b>  | 7.92 <b>b</b>  |
| 4-allyl syringol                 | 10.3 <b>ab</b> | 13.2 <b>b</b>  | 2.7 <b>a</b>   | 8.6 <b>ab</b>  | 7.6 <b>ab</b>  | 7.23 <b>b</b>  | 6.72 <b>b</b>  | 2.37 <b>a</b>  |
| <b>FATTY ACIDS</b>               |                |                |                |                |                |                |                |                |
| Isobutyric acid                  | 713 <b>ab</b>  | 591 <b>a</b>   | 1375 <b>c</b>  | 1417 <b>c</b>  | 988 <b>b</b>   | 1155           | 1226           | 1004           |
| Butyric acid                     | 1244 <b>ab</b> | 1049 <b>a</b>  | 1550 <b>b</b>  | 1695 <b>bc</b> | 1931 <b>c</b>  | 1859           | 1802           | 1427           |
| Isovaleric acid                  | 398 <b>ab</b>  | 397 <b>a</b>   | 566 <b>c</b>   | 552 <b>bc</b>  | 497 <b>abc</b> | 518            | 549            | 495            |
|                                  |                |                | 3922           |                |                |                |                |                |
| Hexanoic acid                    | 4075 <b>ab</b> | 3746 <b>a</b>  | <b>ab</b>      | 4714 <b>bc</b> | 5144 <b>c</b>  | 4872           | 4805           | 4077           |
| Octanoic acid                    | 3969 <b>ab</b> | 3612 <b>a</b>  | 4162 <b>b</b>  | 3959 <b>ab</b> | 4135 <b>b</b>  | 4076           | 4049           | 4466           |
| Decanoic acid                    | 2191 <b>b</b>  | 1798 <b>ab</b> | 1554 <b>a</b>  | 1753 <b>ab</b> | 2124 <b>b</b>  | 1961           | 1857           | 1822           |
| Dodecanoic acid                  | 61.6 <b>b</b>  | 45.0 <b>ab</b> | 31.4 <b>a</b>  | 25.9 <b>a</b>  | 50.5 <b>b</b>  | 43.4           | 39.2           | 37.0           |
| <b>ALDEHYDES</b>                 |                |                |                |                |                |                |                |                |
| Isobutyraldehyde                 | 7.9 <b>ab</b>  | 9.1 <b>ab</b>  | 12.8 <b>b</b>  | 12.6 <b>b</b>  | 7.1 <b>a</b>   | 10.3           | 6.3            | 11.6           |
| 2-methylbutanal                  | 2.75 <b>ab</b> | 2.73 <b>ab</b> | 3.11 <b>b</b>  | 2.40 <b>ab</b> | 1.73 <b>a</b>  | 2.36           | 1.64           | 2.43           |
| 3-methylbutanal                  | 10.9 <b>ab</b> | 8.8 <b>a</b>   | 18.5 <b>b</b>  | 17.5 <b>b</b>  | 16.4 <b>b</b>  | 16.9           | 17.4           | 17.7           |
| <b>NEGATIVE VOLATILE PHENOLS</b> |                |                |                |                |                |                |                |                |
| 4-ethylguaicol                   | 3.93 <b>b</b>  | 5.64 <b>c</b>  | 0.78 <b>a</b>  | 0.35 <b>a</b>  | 0.31 <b>a</b>  | 0.37 <b>a</b>  | 0.19 <b>a</b>  | 1.37 <b>b</b>  |
| 4-ethylphenol                    | 1.53 <b>ab</b> | 8.43 <b>b</b>  | 1.50 <b>ab</b> | n.d. <b>a</b>  | n.d. <b>a</b>  | 0.10 <b>a</b>  | 0.03 <b>a</b>  | 2.80 <b>b</b>  |
| 4-vinylguaicol                   | 119 <b>a</b>   | 131 <b>a</b>   | 435 <b>b</b>   | 280 <b>ab</b>  | 249 <b>a</b>   | 330 <b>b</b>   | 165 <b>a</b>   | 437 <b>b</b>   |
| 4-vinylphenol                    | 234 <b>ab</b>  | 258 <b>b</b>   | 642 <b>c</b>   | 39 <b>a</b>    | 33 <b>a</b>    | 140 <b>a</b>   | 28.9 <b>a</b>  | 807 <b>b</b>   |
| <b>SULPHUR COMPOUNDS</b>         |                |                |                |                |                |                |                |                |
| Methyl thioacetate               | 3.78 <b>ab</b> | 2.53 <b>a</b>  | 4.87 <b>b</b>  | 5.27 <b>b</b>  | 3.13 <b>a</b>  | 4.00           | 3.30           | 4.87           |
| Dimethyl disulfide               | 6.10 <b>b</b>  | 5.87 <b>b</b>  | 9.19 <b>c</b>  | 1.37 <b>a</b>  | 1.25 <b>a</b>  | 2.47 <b>a</b>  | 1.32 <b>a</b>  | 12.1 <b>b</b>  |
| Ethyl thioacetate                | 4.58 <b>a</b>  | 3.54 <b>a</b>  | 11.56 <b>b</b> | 1.50 <b>a</b>  | 1.21 <b>a</b>  | 3.46 <b>a</b>  | 1.73 <b>a</b>  | 10.9 <b>b</b>  |
| Methional                        | 2.18 <b>a</b>  | 3.60 <b>a</b>  | 4.26 <b>a</b>  | 5.85 <b>ab</b> | 7.62 <b>b</b>  | 6.66           | 7.1            | 4.10           |

Values with different letter in the same row indicate statistically significant differences ( $p < 0.05$ ), and values without letter indicate no statistically significant differences.

n.d. Not detected

**Table S3.** Concentration of individual low molecular weight phenolic compounds (mg/L) and volatile compounds ( $\mu\text{g/L}$ ) identified and quantified in the rosé wines.

|                             | RD              | BI            | TO             | CI              |
|-----------------------------|-----------------|---------------|----------------|-----------------|
| <b>HBA</b>                  |                 |               |                |                 |
| Gallic acid                 | 5.81 <b>a</b>   | 5.96 <b>a</b> | 21.54 <b>b</b> | 9.59 <b>a</b>   |
| Protocatechuic acid         | 0.89 <b>ab</b>  | 0.80 <b>a</b> | 1.10 <b>b</b>  | 0.84 <b>a</b>   |
| Vanillic acid               | 0.30            | 0.62          | 0.48           | 0.29            |
| Syringic acid               | 1.97 <b>a</b>   | 1.94 <b>a</b> | 2.27 <b>a</b>  | 5.37 <b>b</b>   |
| Ellagic acid                | n.d.            | n.d.          | n.d.           | n.d.            |
| Ethyl gallate               | 0.58            | 1.46          | 3.41           | 1.54            |
| <b>HCA</b>                  |                 |               |                |                 |
| Caffeic acid                | 7.79 <b>b</b>   | 2.18 <b>a</b> | 1.76 <b>a</b>  | 1.77 <b>a</b>   |
| <i>Trans</i> -coumaric acid | 3.35 <b>b</b>   | 1.67 <b>a</b> | 1.29 <b>a</b>  | 1.28 <b>a</b>   |
| <b>HCATE</b>                |                 |               |                |                 |
| <i>Trans</i> -caftaric acid | 12.78 <b>ab</b> | 9.17 <b>a</b> | 22.45 <b>b</b> | 12.40 <b>ab</b> |
| <i>Cis</i> -coutaric acid   | 2.44 <b>b</b>   | 1.15 <b>a</b> | 2.40 <b>b</b>  | 2.70 <b>b</b>   |
| <i>Trans</i> coutaric acid  | 3.42 <b>ab</b>  | 1.80 <b>a</b> | 5.34 <b>b</b>  | 4.36 <b>b</b>   |
| <i>Trans</i> fertaric acid  | 1.83 <b>b</b>   | 1.04 <b>a</b> | 2.25 <b>c</b>  | 2.21 <b>c</b>   |
| <b>FLAVANOLS</b>            |                 |               |                |                 |
| Catechin                    | 5.50            | 7.26          | 5.08           | 6.22            |
| Epicatechin                 | 2.46            | 4.76          | 2.46           | 3.17            |
| <b>FLAVONOLS</b>            |                 |               |                |                 |
| Quercetin                   | 0.32 <b>ab</b>  | 0.13 <b>a</b> | 0.08 <b>a</b>  | 0.43 <b>b</b>   |
| Quercetin derivatives       | 0.40 <b>a</b>   | 0.26 <b>a</b> | 0.84 <b>a</b>  | 1.83 <b>b</b>   |

Values with different letter in the same row indicate statistically significant differences ( $p < 0.05$ ), and values without letter indicate no statistically significant differences.

n.d. Not detected

**Table S4.** Concentration of individual volatile compounds (µg/L) identified and quantified in the rosé wines.

|                               | <b>RD</b>        | <b>BI</b>       | <b>TO</b>       | <b>CI</b>       |
|-------------------------------|------------------|-----------------|-----------------|-----------------|
| <b>HIGHER ALCOHOLS</b>        |                  |                 |                 |                 |
| 1-propanol                    | 19865            | 29700           | 18997.5         | 28924           |
| Isobutanol                    | 23083            | 24550           | 33883           | 23609           |
| 1-butanol                     | 408 <b>a</b>     | 933 <b>b</b>    | 583 <b>ab</b>   | 650 <b>ab</b>   |
| 2-methyl-1-butanol            | 29583            | 29667           | 31450           | 26758           |
| 3-methyl-1-butanol            | 191163 <b>ab</b> | 177300 <b>a</b> | 215633 <b>b</b> | 172851 <b>a</b> |
| 2-phenylethanol               | 25103            | 18366           | 21511           | 22325           |
| <b>ETHYL ESTERS</b>           |                  |                 |                 |                 |
| Ethyl butyrate                | 365 <b>ab</b>    | 409 <b>ab</b>   | 460 <b>b</b>    | 353 <b>a</b>    |
| Ethyl isovalerate             | 20.5 <b>ab</b>   | 28.5 <b>b</b>   | 14.5 <b>a</b>   | 16.1 <b>a</b>   |
| Ethyl-2-methylbutyrate        | 8.8 <b>ab</b>    | 15.7 <b>b</b>   | 7.7 <b>a</b>    | 8.5 <b>a</b>    |
| Ethyl hexanoate               | 679              | 721             | 798             | 715             |
| Ethyl octanoate               | 1011             | 1034            | 976             | 935             |
| Ethyl decanoate               | 351              | 279             | 178             | 288             |
| <b>ALCOHOL ACETATES</b>       |                  |                 |                 |                 |
| Propyl acetate                | 28               | 35              | 47.3            | 31.5            |
| Isobutyl acetate              | 50 <b>a</b>      | 255 <b>ab</b>   | 447 <b>b</b>    | 130 <b>a</b>    |
| Isoamyl acetate               | 3683 <b>b</b>    | 2360 <b>ab</b>  | 1660 <b>a</b>   | 2225 <b>ab</b>  |
| Hexyl acetate                 | 61.3             | 112.2           | 85.5            | 147.1           |
| β-phenethyl acetate           | 553 <b>b</b>     | 196 <b>a</b>    | 214 <b>a</b>    | 268 <b>a</b>    |
| <b>ALCOHOLS C6</b>            |                  |                 |                 |                 |
| 1-hexanol                     | 1048 <b>a</b>    | 962 <b>a</b>    | 1948 <b>b</b>   | 1623 <b>b</b>   |
| <i>Trans</i> -3-hexenol       | 45               | 58.7            | 58.3            | 43.3            |
| <i>Cis</i> -3-hexenol         | 256 <b>b</b>     | 99 <b>a</b>     | 187 <b>ab</b>   | 255 <b>b</b>    |
| <b>TERPENES</b>               |                  |                 |                 |                 |
| Linalool                      | 42.3 <b>a</b>    | 35.2 <b>a</b>   | 112 <b>a</b>    | 427 <b>b</b>    |
| α-Terpineol                   | 3.00             | 5.33            | 9.50            | 4.50            |
| β-citronellol                 | 3.25             | 3.00            | 9.00            | 5.70            |
| <b>WHISKEY LACTONES</b>       |                  |                 |                 |                 |
| <i>Trans</i> -whiskey lactone | 7.3 <b>a</b>     | 8.5 <b>a</b>    | 42.0 <b>a</b>   | 163 <b>b</b>    |
| <i>Cis</i> -whiskey lactone   | 5.0 <b>a</b>     | 3.7 <b>a</b>    | 13.3 <b>a</b>   | 442 <b>b</b>    |
| <b>VANILLIC DERIVATIVES</b>   |                  |                 |                 |                 |

|                                  |                |                |                |                |
|----------------------------------|----------------|----------------|----------------|----------------|
| Vanillin                         | 3.5 <b>a</b>   | 6.67 <b>a</b>  | 9.5 <b>a</b>   | 118 <b>b</b>   |
| Methyl vanillate                 | 7.0 <b>a</b>   | 7.83 <b>a</b>  | 16.0 <b>a</b>  | 132 <b>b</b>   |
| Ethyl vanillate                  | 15.3 <b>a</b>  | 38.3 <b>a</b>  | 61.0 <b>a</b>  | 272 <b>b</b>   |
| Acetovanillone                   | 19.3 <b>a</b>  | 16.3 <b>a</b>  | 41.0 <b>a</b>  | 144 <b>b</b>   |
| <b>FURANIC DERIVATIVES</b>       |                |                |                |                |
| Furfural                         | 46.5           | 76.5           | 19.3           | 228            |
| 5-Methylfurfural                 | 1.75           | 2.17           | 1.25           | 27.5           |
| Furfuryl alcohol                 | 1173 <b>ab</b> | 693 <b>a</b>   | 1563 <b>b</b>  | 816 <b>a</b>   |
| <b>POSITIVE VOLATILE PHENOLS</b> |                |                |                |                |
| Guaiacol                         | 3.0            | 2.50           | 1.25           | 12.5           |
| Eugenol                          | 2.75 <b>a</b>  | 1.67 <b>a</b>  | 7.0 <b>a</b>   | 95.0 <b>b</b>  |
| <i>Trans</i> -isoeugenol         | 3.5 <b>a</b>   | 5.67 <b>a</b>  | 1.00 <b>a</b>  | 54.5 <b>b</b>  |
| Syringol                         | 3.25 <b>a</b>  | 1.83 <b>a</b>  | 3.50 <b>a</b>  | 49.6 <b>b</b>  |
| 4-methyl-syringol                | 3.00           | 3.67           | 0.50           | 17.2           |
| 4-allyl syringol                 | 12.8 <b>a</b>  | 20.0 <b>a</b>  | 5.0 <b>a</b>   | 65.6 <b>b</b>  |
| <b>FATTY ACIDS</b>               |                |                |                |                |
| Isobutyric acid                  | 806            | 654            | 554            | 574            |
| Butyric acid                     | 1166           | 1211           | 1221           | 958            |
| Isovaleric acid                  | 400            | 416            | 322            | 313            |
| Hexanoic acid                    | 3609           | 3415           | 3573           | 3145           |
| Octanoic acid                    | 3819           | 3575           | 3338           | 3546           |
| Decanoic acid                    | 1949 <b>b</b>  | 2015 <b>ab</b> | 1464 <b>ab</b> | 1064 <b>a</b>  |
| Dodecanoic acid                  | 48.3           | 50.3           | 40.8           | 56.2           |
| <b>ALDEHYDES</b>                 |                |                |                |                |
| Isobutyraldehyde                 | 6.00 <b>a</b>  | 10.7 <b>b</b>  | 8.50 <b>ab</b> | 7.80 <b>ab</b> |
| 2-methylbutanal                  | 1.25 <b>a</b>  | 3.33 <b>b</b>  | 2.00 <b>ab</b> | 2.7 <b>b</b>   |
| 3-methylbutanal                  | 13.6 <b>ab</b> | 10.5 <b>a</b>  | 13.3 <b>ab</b> | 16.5 <b>b</b>  |
| <b>NEGATIVE VOLATILE PHENOLS</b> |                |                |                |                |
| 4-ethylguaicol                   | 0.25           | 0.17           | 0.50           | 6.30           |
| 4-ethylphenol                    | 1.50           | 1.17           | 2.25           | 4.60           |
| 4-vinylguaiaicol                 | 12.8 <b>a</b>  | 19.7 <b>a</b>  | 19.3 <b>a</b>  | 155 <b>b</b>   |
| 4-vinylphenol                    | 30.5           | 62.5           | 2.00           | 17.5           |
| <b>SULPHUR COMPOUNDS</b>         |                |                |                |                |
| Methyl thioacetate               | 5.54 <b>b</b>  | 2.43 <b>a</b>  | 4.3 <b>ab</b>  | 3.11 <b>ab</b> |
| Dimethyl disulfide               | 1.9 <b>a</b>   | 5.77 <b>b</b>  | 4.7 <b>b</b>   | 4.1 <b>ab</b>  |

|                   |      |      |      |      |
|-------------------|------|------|------|------|
| Ethyl thioacetate | 3.43 | 4.18 | 4.69 | 5.34 |
| Methional         | 5.01 | 2.22 | 5.36 | 4.68 |

Values with different letter in the same row indicate statistically significant differences ( $p < 0.05$ ), and values without letter indicate no statistically significant differences.

n.d. Not detected
